# Supplementary material
Source: publisher figshare collection journal article supplement (https://acs.figshare.com/ndownloader/files/22179966)
Supplement: Supplementary file 1 [file 22179966]

Supplementary Information for

**Normal and Abnormal NHC Coordination in  $[\text{Os}_4(\mu\text{-H})_4(\text{CO})_{11}(\text{IMes})]$  and Exhaustive Dehydrogenation of an IMes Methyl Group**

Craig E. Cooke<sup>a</sup>, Michael C. Jennings<sup>b</sup>, and Roland K. Pomeroy<sup>a</sup> and Jason A. C. Clyburne<sup>\*c</sup>

*a* Department of Chemistry, Simon Fraser University, 8888 University Drive, Burnaby BC V5A 1S6, Canada

*b* Department of Chemistry, University of Western Ontario, 1151 Richmond St, London ON N6A 5B7 Canada

*c* Department of Chemistry, Saint Mary's University, Halifax NS, B3H 3C3, Canada.

**General considerations:** Care should be exercised when working with both osmium carbonyls due to health and exposure risks. Unless otherwise stated, manipulations of starting materials and products were carried out under a nitrogen atmosphere with the use of standard Schlenk techniques. Solvents were thoroughly dried before use.

#### Synthetic procedures and selected characterization data:

(1-nlMes):  $[\text{Os}_4(\mu\text{-H})_4(\text{CO})_{11}(\text{CO})]$  (1-CO) (110 mg, 0.1 mmol) in  $\text{CH}_2\text{Cl}_2$  (50 mL) was stirred with two equivalents of trimethylamine *N*-oxide (15mg, 0.2mmol) in  $\text{CH}_2\text{Cl}_2$  (20 mL) being added drop wise over 20 minutes at  $0^\circ\text{C}$ . Subsequently,  $[(\text{IMes})\text{AgCl}]$  (47.1mg, 0.1mmol) was then added. After stirring for two hours the solution had changed color from yellow to dark orange-brown. The appearance of grey  $\text{AgCl(s)}$  in the bottom of the reaction vessel was used to determine reaction completion. The solvent was removed *in vacuo* and the remaining solid dissolved in a minimum of  $\text{CH}_2\text{Cl}_2$  and applied to a silica gel column. Elution under a 20% solution of  $\text{CH}_2\text{Cl}_2$  to hexanes afforded a single orange-yellow band of (1-nlMes), (29 mg, 21%).

(1-nlMes): IR(in  $\text{CH}_2\text{Cl}_2$ )  $\nu(\text{CO})$ : 2094 sh, 2085 m, 2064 sh, 2053 vs, 2045 s, 2023 s, 2011 sh, 1996 m, br, 1979 m, 1951 w  $\text{cm}^{-1}$ .  $^1\text{H}$  NMR (500 MHz, 295 K,  $\text{CD}_2\text{Cl}_2$ )  $\delta$  -20.14 [s, br,  $\mu\text{-H}$ ], 2.12 [s, 12H, *ortho*- $\text{CH}_3$ ], 2.35 [s, 6H, *para*- $\text{CH}_3$ ], 7.05 [s, 4H, *meta*-H], 7.09 [d, 2H, *im*-H].  $^{13}\text{C}\{^1\text{H}\}$  NMR (100.61 MHz, 295 K,  $\text{CD}_2\text{Cl}_2$ )  $\delta$  19.4 [s, *o*- $\text{CH}_3$ ], 21.4 [s, *p*- $\text{CH}_3$ ], 124.9 [s, *NCC*], 130.5 [s, *Ar*-C-3,5], 135.9 [s, *Ar*-C-2,6], 137.1 [s, *Ar*-C1,], 141.0 [s, *Ar*-C-4]. MS (LSIMS) 1377.9 ( $\text{P}^+$ ). Anal. Calc. for  $\text{C}_{32}\text{H}_{28}\text{N}_2\text{O}_{11}\text{Os}_4$  C, 27.90, H 2.05, N 2.03. Found C, 27.77, H, 2.10, N 1.93.

(1-alMes): (1-nlMes) (184 mg, 0.133 mmol) was dissolved in benzene (15 mL) and heated to  $200^\circ\text{C}$  in a Carius tube degassed three times by freeze-pump-thaw techniques. After 72 hours the solution was cooled and solvent removed *in vacuo*. The remaining solid was dissolved in a minimum of  $\text{CH}_2\text{Cl}_2$  and applied to a silica gel column. IR spectroscopic studies were performed on the reaction mixtures before and after column chromatography, and these studies indicated that no rearrangements occurred on the column. Compound (1-alMes) was eluted in a 20%  $\text{CH}_2\text{Cl}_2$  solution of hexanes as a yellow band (63 mg, 34%). **2** was eluted in a 20%  $\text{CH}_2\text{Cl}_2$  solution of hexanes as a red-brown band (31 mg, 16%). IR spectroscopic evidence was found to support the existence of trace quantities of one other product tentatively assigned to an  $\text{NHC-Os}_6$  cluster.

(1-alMes): IR (in  $\text{CH}_2\text{Cl}_2$ )  $\nu(\text{CO})$ : 2084 m, 2052 vs, 2038 s, 2021 s, 1995 m, 1985 m, 1977 m, 1942 br, sh, w  $\text{cm}^{-1}$ .  $^1\text{H}$  NMR (600 MHz, 295 K,  $\text{CD}_2\text{Cl}_2$ )  $\delta$  -20.50 [s, 1H,], -19.85 [s, 2H,  $\mu\text{-H}$ ], -19.85 [s, 1H,  $\mu\text{-H}$ ], 2.07 [s, 3H, *o*- $\text{CH}_3$ ], 2.09 [s, 3H, *o*- $\text{CH}_3$ ], 2.11 [s, 3H, *o*- $\text{CH}_3$ ], 2.2 [s, br, 3H, *o*- $\text{CH}_3$ ], 2.2 [s, br, 6H, *p*- $\text{CH}_3$ ], 6.63 [s, 1H, *meta*-H], 6.68 [s, 2H, *meta*-H], 7.04 [s, 1H, *im*-H], 7.07 [s, 1H, *im*-H], 7.09 [s, 2H, *im*-H], 7.95 [s, 2H, C(1)-H], 7.99 [s, 1H, C(1)-H].  $^{13}\text{C}\{^1\text{H}\}$  NMR (150.92 MHz, 295 K,  $\text{CD}_2\text{Cl}_2$ )  $\delta$  17.3 [s, *o*- $\text{CH}_3$ ], 17.4 [s, *o*- $\text{CH}_3$ ], 18.3 [s, *o*- $\text{CH}_3$ ], 21.4 [s, *p*- $\text{CH}_3$ ], 21.5 [s, *p*- $\text{CH}_3$ ], 126.0 [s, *NCA-NHC-C*], 129.9 [s, *Ar*-C-3,5], 130.1 [s, *Ar*-C-3,5], 130.2 [s, *Ar*-C-3,5], 131.4 [s, *Ar*-C-3,5], 134.1 [s, *Ar*-C-2,6], 134.2 [s, *Ar*-C-2,6], 134.4 [s, *Ar*-C-2,6], 134.7 [s, *Ar*-C-2,6], 135.0 [s, *Ar*-C1], 136.0 [s, *Ar*-C1,], 141.4 [s, *Ar*-C-4], 141.9 [s, *Ar*-C-4], 177.4 [s, *NCA-NHC-C*] MS (LSIMS) 1377.9 ( $\text{P}^+$ ). Anal. Calc. for  $\text{C}_{32}\text{H}_{28}\text{N}_2\text{O}_{11}\text{Os}_4$  C, 27.90, H 2.05, N 2.03. Found C, 27.41, H, 2.04, N 2.24.

**2**: IR(in  $\text{CH}_2\text{Cl}_2$ )  $\nu(\text{CO})$ : 2076 s, 2044 vs, 2013 s, 1996 s, 1980 m, 1969 m, 1916 br, w  $\text{cm}^{-1}$ .  $^1\text{H}$  NMR (600 MHz, 295 K,  $\text{CD}_2\text{Cl}_2$ )  $\delta$  -19.95 [s,  $\mu\text{-H}$ ], 1.32 [s, 3H, H57], 2.20 [s, 3H, H59], 2.30 [s, 3H, H58], 2.33 [s, 3H, H67], 2.59 [s, 3H, H68], 6.86 [m, 1H, H75A], 6.88 [s, 1H, H53A], 6.92 [s, 1H, H55A], 7.03 [s, 1H, H63A], 7.11 [s, 1H, H63A], 7.17 [d,  $J_{\text{HH}} = 2.3$  Hz, 1H, H4A], 7.18 [m, 1H, H74A], 7.57 [d,  $J_{\text{HH}} = 8.7$  Hz, 1H, H76A], 7.71 [d,  $J_{\text{HH}} = 2.3$  Hz, 1H, H3A], 7.84 [d,  $J_{\text{HH}} = 7.8$  Hz, 1H, H73A].

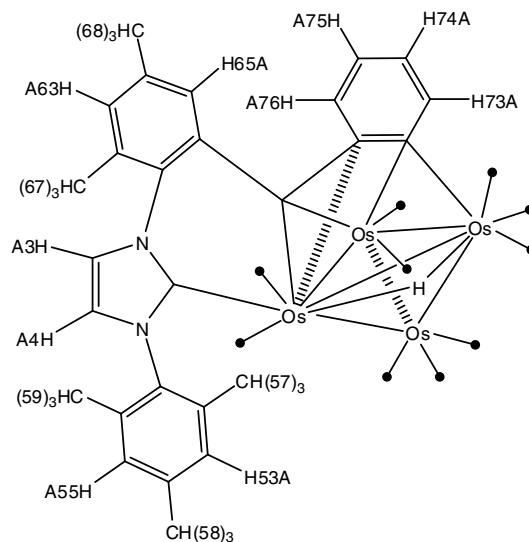

$^{13}\text{C}\{^1\text{H}\}$  NMR data and tentative assignments (150.91 MHz, 295K,  $\text{CD}_2\text{Cl}_2$ )  $\delta$  18.5 [s, C57], 19.7 [s, C59], 20.5 [s, C67], 21.0 [s, C68], 21.3 [s, C58], 120.6 [s, C53], 123.8 [s, C4], 123.9 [s, C3], 128.1 [s, C55], 129.3 [s, C75], 129.5 [s, C63], 130.0 [s, C76], 130.8 [s, C74], 131.1 [s, C73], 132.4 [s, C65], 134.3 [s, C52], 135.8 [s, C56], 135.9 [s, C62], 136.9 [s, C51], 137.0 [s, C61], 140.8 [s, C66], 147.0 [s, C54], 148.0 [s, C64], 155.2 [s, C69], 162.9 [s, C71], 166.6 [s, C72], 181.0 [s, C1].

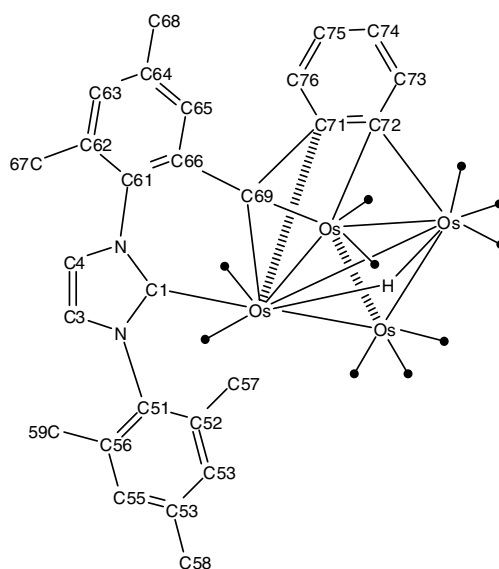

MS (LSIMS) 1419.7 (P+). Anal. Calc. for  $\text{C}_{37}\text{H}_{26}\text{N}_2\text{O}_{10}\text{Os}_4$  C, 31.31, H 1.85, N 1.97. Found C 31.32, H 1.99, N 1.72.

Solution studies: (**1**·aNHC) (45 mg, 0.033 mmol) was dissolved in benzene (20 mL) and heated to 200°C in a Carius tube degassed three times by freeze-pump-thaw techniques. After 48 hrs the reaction mixture was subjected to column chromatography and the isolated materials corresponded to **2** (23 mg, 0.016 mmol) and *trace* of (**1**·aIMes). Infrared spectroscopic evidence for the generation of a small amount of  $\text{Os}_4\text{H}_4(\text{CO})_{12}$  was also observed as indicated by diagnostic bands at 2067 and 2019  $\text{cm}^{-1}$ . Some insoluble black material was noted at the top of the column.

Crystal data: for **(1·nIMes)**:  $C_{32}H_{28}N_2O_{11}Os_4$ , Orthorhombic, Space group  $Pca2(1)$ ,  $a = 27.9147(5) \text{ \AA}$ ,  $b = 16.5133(3) \text{ \AA}$ ,  $c = 15.2219(2) \text{ \AA}$ ,  $\alpha = 90^\circ$ ,  $\beta = 90^\circ$ ,  $\gamma = 90^\circ$ ,  $V = 7016.7(2) \text{ \AA}^3$ ,  $Z = 8$ ,  $D_c = 2.608 \text{ Mg/m}^3$ , Absorption coefficient =  $14.500 \text{ mm}^{-1}$ ,  $R1 = 0.0839$ ,  $wR2 = 0.1011$  GOF = 0.969.

Crystal data: for **(1·alMes)**:  $C_{32}H_{28}N_2O_{11}Os_4$ , triclinic, Space group  $P-1$ ,  $a = 14.0263(5) \text{ \AA}$ ,  $b = 15.9043(6) \text{ \AA}$ ,  $c = 16.2287(6) \text{ \AA}$ ,  $\alpha = 96.672(2)^\circ$ ,  $\beta = 96.046(2)^\circ$ ,  $\gamma = 90.049(2)^\circ$ ,  $V = 3575.4(2) \text{ \AA}^3$ ,  $Z = 4$ ,  $D_c = 2.599 \text{ Mg/m}^3$ , Absorption coefficient =  $14.299 \text{ mm}^{-1}$ ,  $R1 = 0.0672$ ,  $wR2 = 0.1781$  GOF = 1.020.

Crystal data: for **(2)**:  $C_{40}H_{33}N_2O_{10}Os_4$ , Triclinic, Space group  $P-1$ ,  $a = 12.3074(4) \text{ \AA}$ ,  $b = 12.6819(4) \text{ \AA}$ ,  $c = 14.7598(5) \text{ \AA}$ ,  $\alpha = 74.792(2)^\circ$ ,  $\beta = 87.235(2)^\circ$ ,  $\gamma = 62.317(2)^\circ$ ,  $V = 1961.26(11) \text{ \AA}^3$ ,  $Z = 2$ ,  $D_c = 2.476 \text{ Mg/m}^3$ , Absorption coefficient =  $12.976 \text{ mm}^{-1}$ ,  $R1 = 0.0552$ ,  $wR2 = 0.1448$  GOF = 1.040.

Also available CIFs for compounds **(1·nIMes)**, **(1·alMes)** and **2**.
